# Supplementary material for: Synthetic hyaluronic acid coating preserves the phenotypes of lymphatic endothelial cells
Source: PubMed Central journal article supplement — Biomater Sci. 2023 Sep 19;11(22):7346–57. doi: 10.1039/d3bm00873h (PMC10628678; doi:10.1039/d3bm00873h), 2023-09-19
Supplement: BM-011-D3BM00873H-s001.pdf [file BM-011-D3BM00873H-s001.pdf]

## Supplementary Materials for

# **Synthetic Hyaluronic Acid Coating Preserves the Phenotypes of Lymphatic Endothelial Cells**

Sanjoy Saha<sup>1</sup>, Fei Fan<sup>1</sup>, Laura Alderfer<sup>1</sup>, Francine Graham<sup>2</sup>, Eva Hall<sup>1</sup>,  
Donny Hanjaya-Putra<sup>\*,1,2,3</sup>

\*Corresponding author, Email: [dputra1@nd.edu](mailto:dputra1@nd.edu)

### **This PDF file includes:**

Supplementary Figure S1 to S6  
Supplementary Table S1 to S2

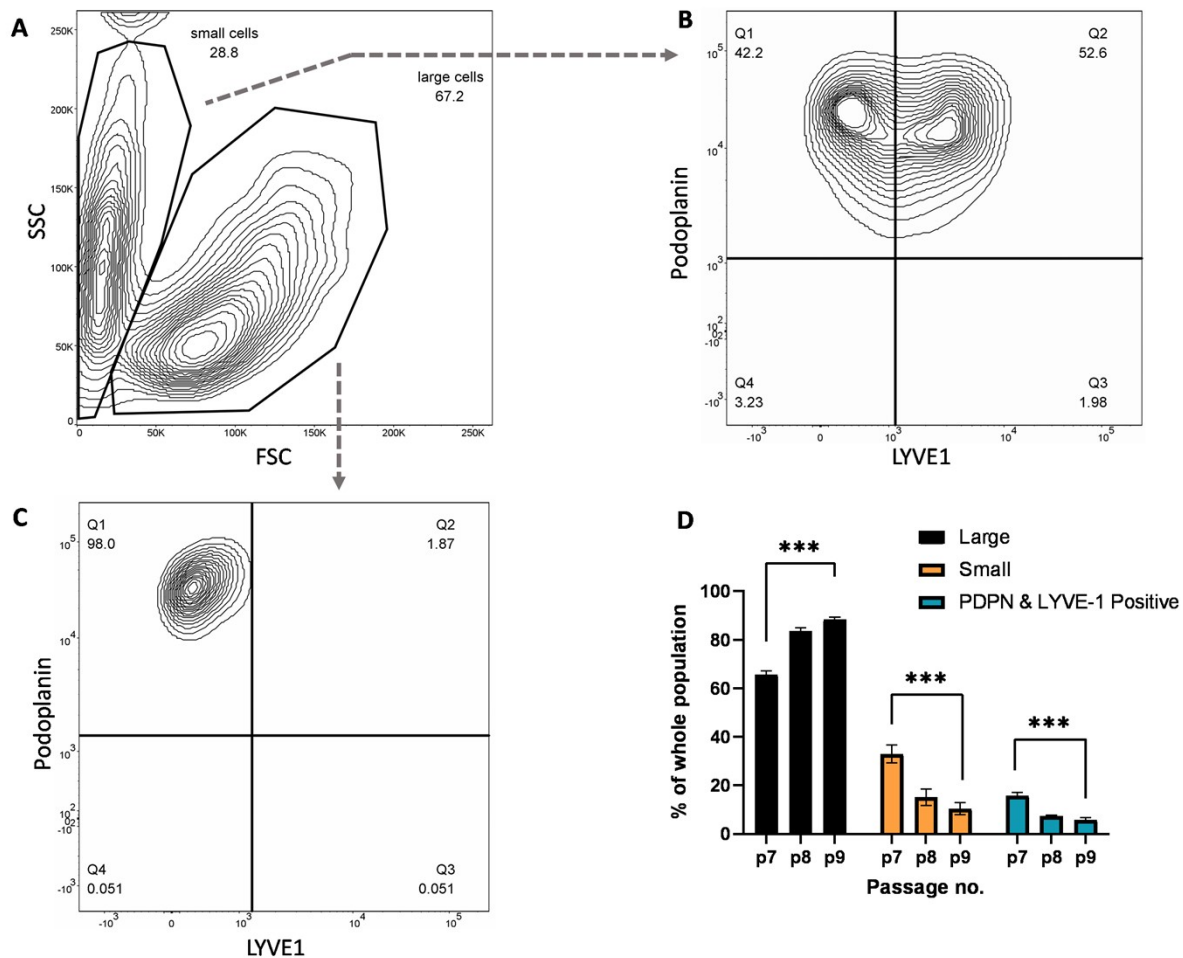

**Supplementary Figure 1.** (A) Representative gating strategy to analyze human LECs using flow cytometry. Human LECs demonstrate a heterogeneous mixture of small (28.8 %) and large cell (67.2 %) populations. (B) Human LECs were stained with PE anti-PDPN and APC anti-LYVE1 antibodies. Flow cytometry analysis indicates that 42.2% of the small cell population is PDPN<sup>+</sup>/LYVE-1<sup>-</sup>, while 52.6% of the small cell population is PDPN<sup>+</sup>/LYVE-1<sup>+</sup>. (C) Flow cytometry analysis indicates that 96.0% of the large cell population is PDPN<sup>+</sup>/LYVE-1<sup>-</sup>. (D) Human LECs were analyzed using flow cytometry after being cultured *in vitro* from passage 7 to 9. Flow cytometry analysis indicates that with an increase in passage number, there is an increase in the amount of large cells and a decrease in the amount of small cell in the population. Flow cytometry analysis using lymphatic markers indicates that as passage number increased, there is a decrease in LYVE-1<sup>+</sup> cells.

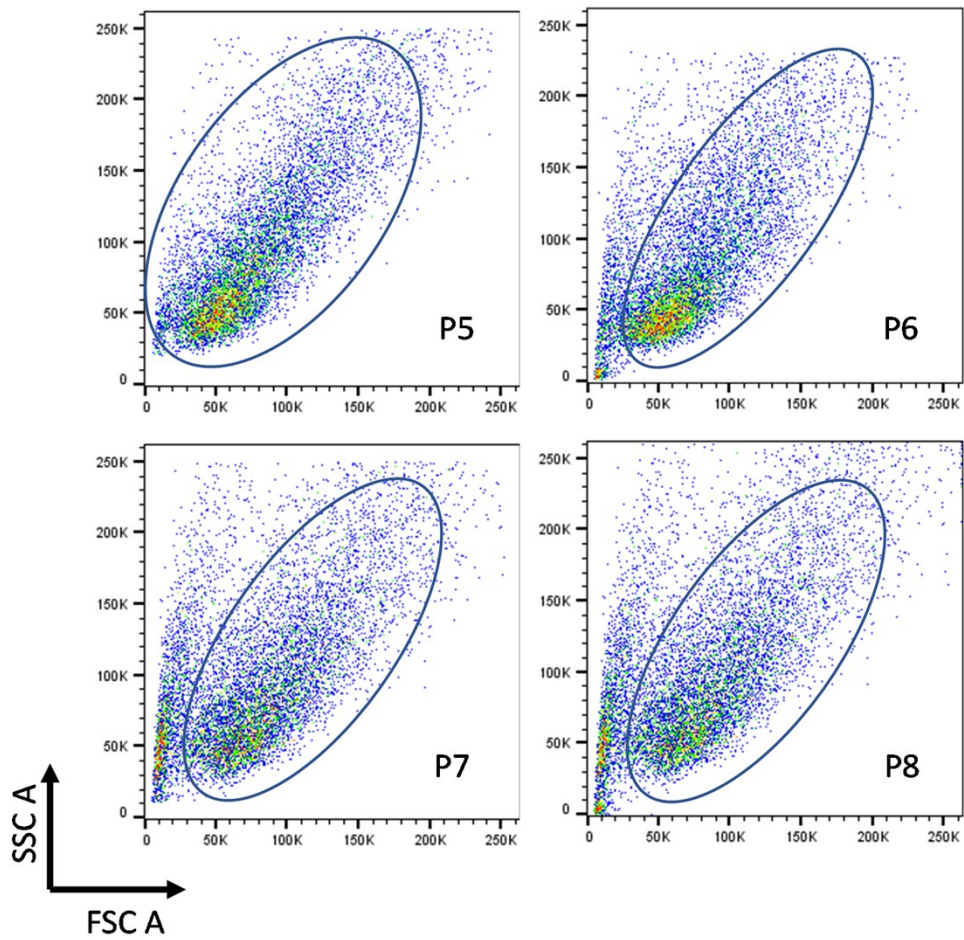

**Supplementary Figure 2.** Representative scatter plots SSC-A vs. FSC-A. The oval area indicating the gating strategy for LEC population from P5-8.

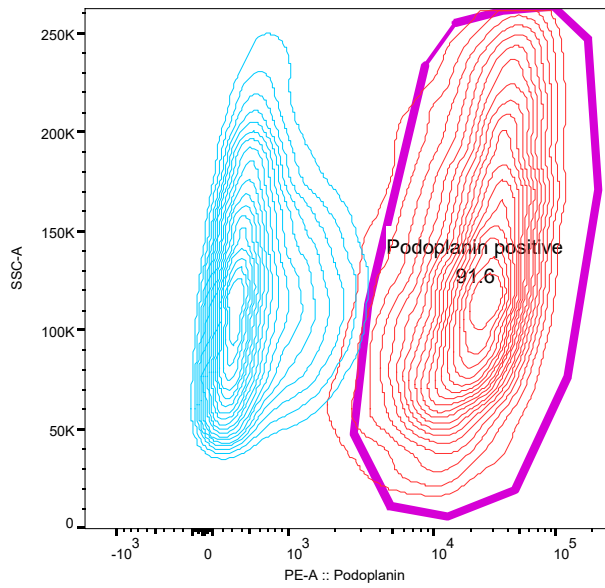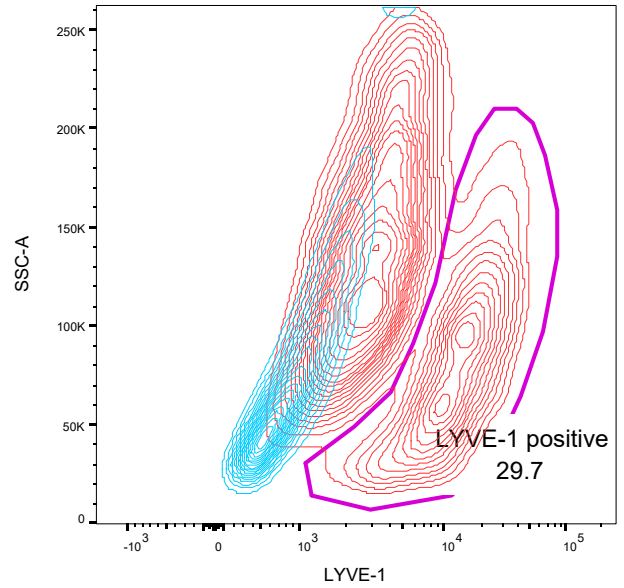

**Supplementary Figure 3.** Representative contour plots for SSC-A vs. Podoplanin (left) and SSC-A vs. LYVE-1 (right). The areas highlighted in purple indicating podoplanin<sup>+</sup> cells (91.6%) and LYVE-1<sup>+</sup> cells (29.7%).

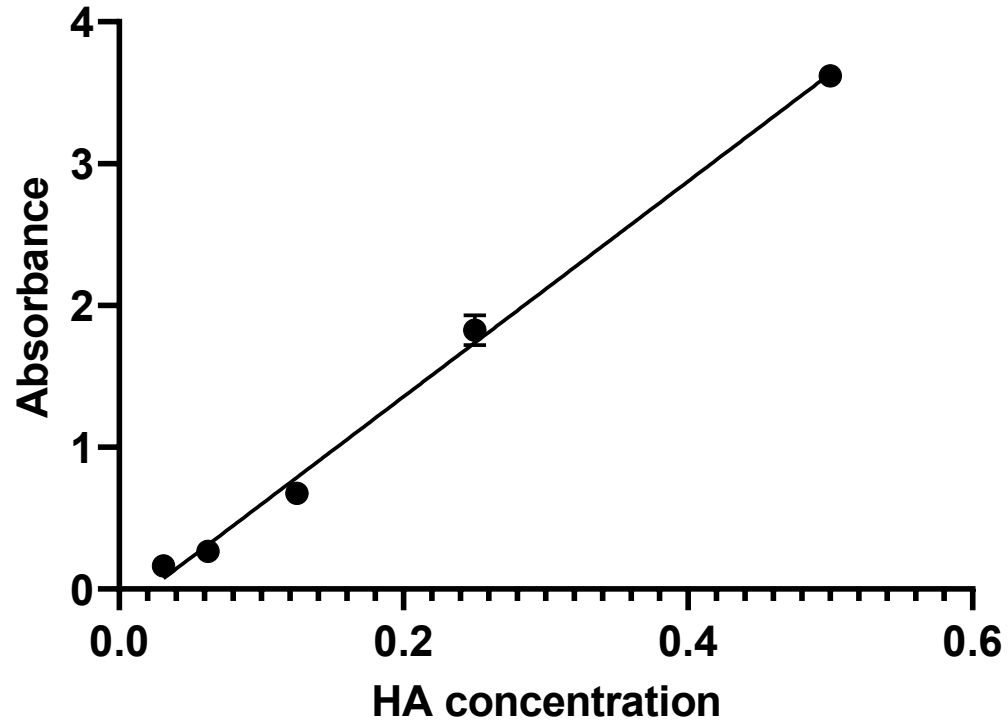

**Supplementary Figure 4.** Standard curve to correlate absorbance (634 nm) to HA-concentration (mg/ml).

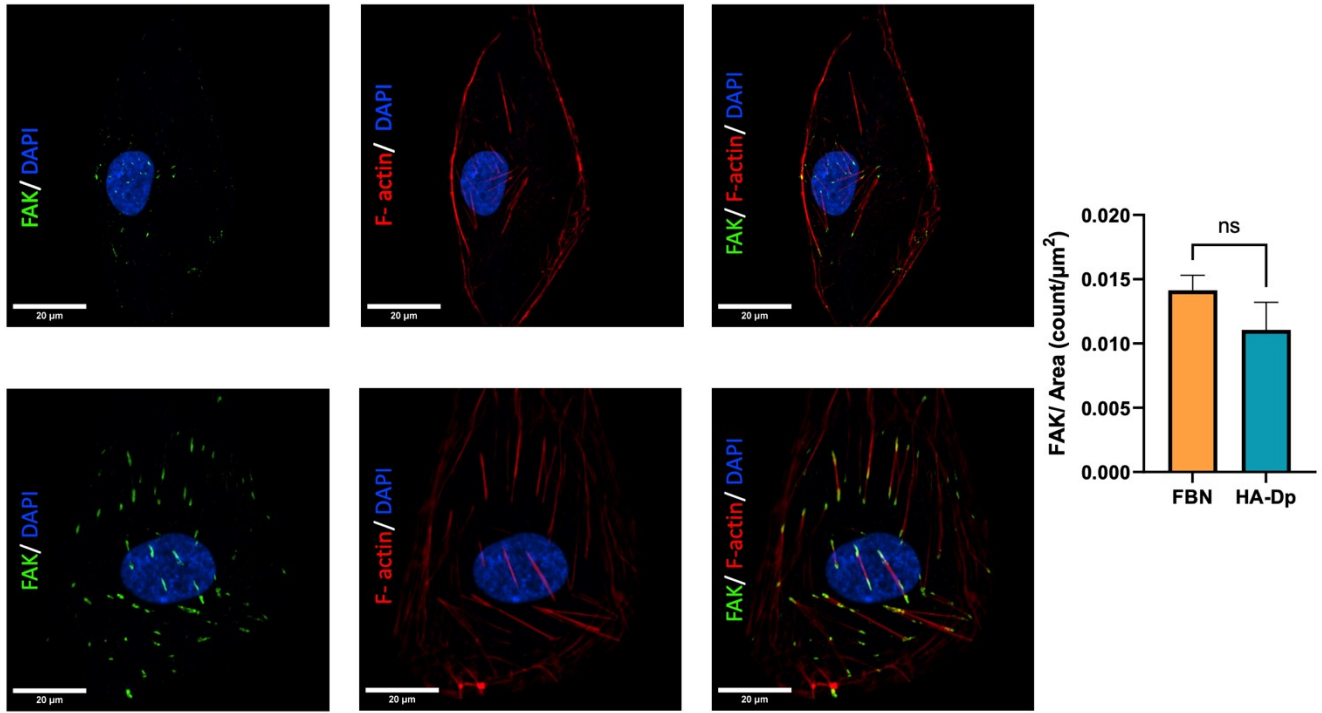

**Supplementary Figure 5.** Focal adhesion kinase (FAK) and F-actin staining for LEC (P.4) on HA-DP (top panel) and FBN (bottom panel). Quantification of FAK is shown in the adjacent graph.

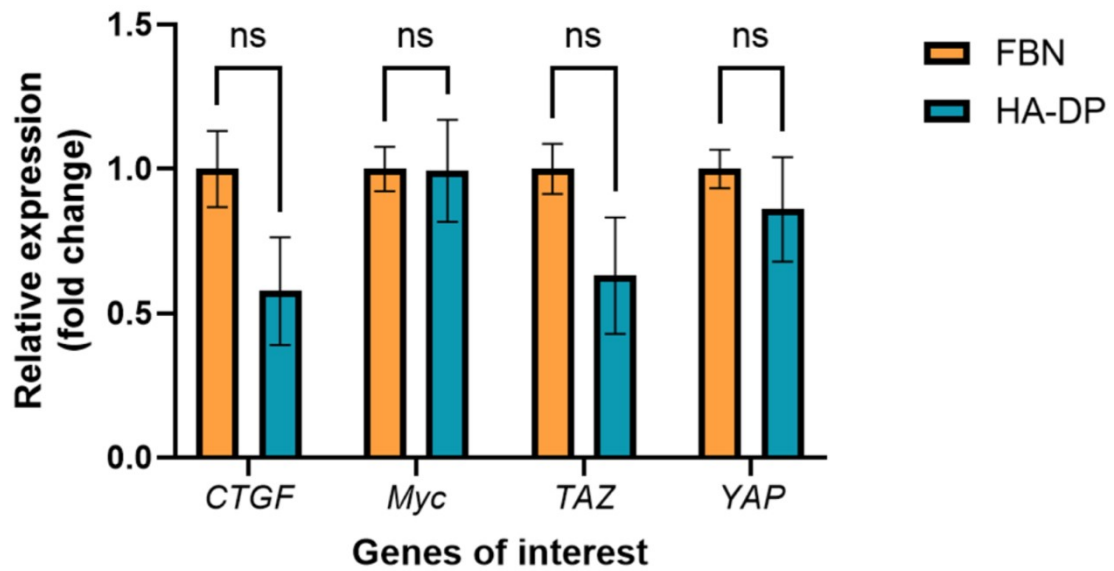

**Supplementary Figure 6.** Early passage LEC (P.4) cultured on FBN and HA-DP were analyzed using qRT-PCR for *CTGF*, *MYC*, *YAP*, and *TAZ*. Statistical significance was set at \*  $p < 0.05$  and <sup>ns</sup>  $p > 0.05$

**Supplementary Table 1. Antibodies used for immunostaining and FASC in this study.**

| <b>Name of Reagent</b> | <b>Company</b>    | <b>Host Species</b> | <b>Catalog Number</b> | <b>Dilution Factor</b> |
|------------------------|-------------------|---------------------|-----------------------|------------------------|
| LYVE-1                 | Abcam             | Mouse               | ab-219556             | 1:1,000                |
| Podoplanin             | Abcam             | Rabbit              | ab-10288              | 1:400                  |
| Phalloidin             | Thermo Fisher     | 594 conjugated      | ab-176753             | 1:1,000                |
| FAK                    | Sigma-Aldrich     | FITC conjugated     | 16-233                | 2 µg/ml                |
| Prox1                  | R&D systems       | Goat                | AF2727                | 1:200                  |
| VECAD                  | BD Bioscience     | Mouse               | 555661                | 1:100                  |
| DAPI                   | Thermo Fisher     | n/a                 | D-1306                | 300 nM                 |
| LYVE-1                 | R&D systems       | Mouse               | FAB20892A             | 1 µg/ml                |
| Podoplanin             | BioLegend         | Rat                 | 337004                | 1 µg/ml                |
| Prox1                  | Novus Biologicals | Mouse               | NBP1-30045AF488       | 1 µg/ml                |



**Supplementary Table 2. Primers used for this study**

| <b>Genes</b>  | <b>Catalog Number</b> |
|---------------|-----------------------|
| <i>LYVE-1</i> | Thermo Hs00272659_m1  |
| <i>PDPN</i>   | Thermo Hs00366766_m1  |
| <i>Prox-1</i> | Thermo Hs00896294_m1  |
| <i>FLT4</i>   | Thermo Hs01047677_m1  |
| <i>GAPDH</i>  | Thermo Hs02786624_g1  |
| <i>YAP</i>    | Thermo Hs00902712_g1  |
| <i>TAZ</i>    | Thermo Hs00902887_g1  |
| <i>MYC</i>    | Thermo Hs00153408_m1  |
| <i>CTGF</i>   | Thermo Hs02786624_g1  |
